# Supplementary material for: Mathematical modeling of plant cell fate transitions controlled by hormonal signals
Source: PubMed Central journal article supplement (PMC7392350; doi:10.1371/journal.pcbi.1007523), 2020-07-20
Supplement: pcbi.1007523.s001.pdf [file pcbi.1007523.s001.pdf]

# Supplementary Information S1 Text:

## Mathematical modeling of plant cell fate transitions controlled by hormonal signals

Filip Z. Klawe<sup>1,\*</sup>, Thomas Stiehl<sup>1,2,3,\*</sup>, Peter Bastian<sup>2</sup>, Christophe Gaillochet<sup>4</sup>,  
Jan U. Lohmann<sup>5</sup>, and Anna Marciniak-Czochra<sup>1,2,3</sup>

<sup>1</sup>*Institute of Applied Mathematics, Heidelberg University, Heidelberg, Germany*

<sup>2</sup>*Interdisciplinary Center for Scientific Computing, Heidelberg University, Heidelberg, Germany*

<sup>3</sup>*Bioquant Center, Heidelberg University, Heidelberg, Germany*

<sup>4</sup>*VIB-UGent Center for Plant Systems Biology, Ghent University, Ghent, Belgium*

<sup>5</sup>*Department of Stem Cell Biology, Centre for Organismal Studies, Heidelberg University, Heidelberg, Germany*

\*These authors contributed equally

**Functions  $f$  and  $g$ .** The shapes of the functions  $f$  and  $g$  are depicted in Fig. A.

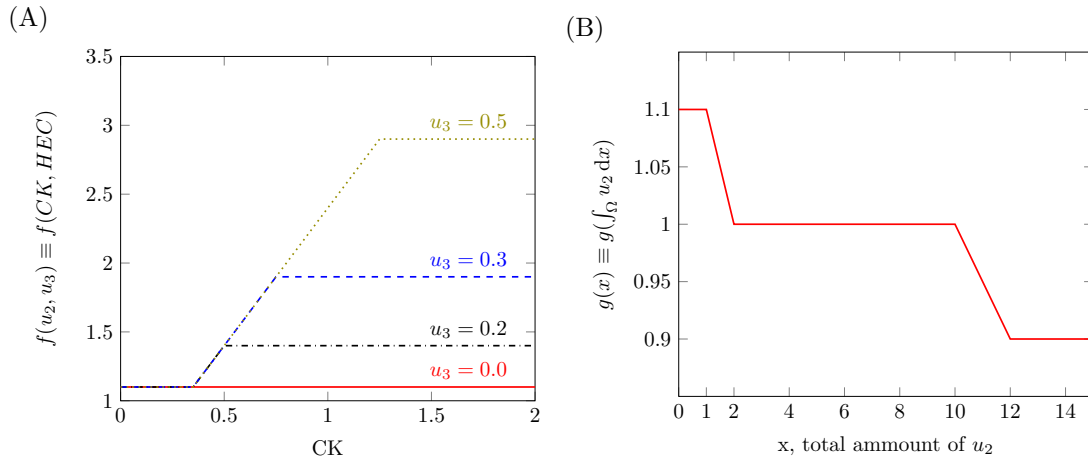

Figure A: **Functions  $f$  and  $g$ .** (A) The shape of the function  $f$  for different concentrations of CK and HEC. (B) The shape of the function  $g$ .
